# Supplementary material for: Quantifying the temperature-dependency of tick seasonality in France and Lyme disease risk in Connecticut
Source: Research Square preprint supplement (doi:10.21203/rs.3.rs-6579504/v1), 2025-05-09
Supplement: Supplementary file 1 [file 4f7973d849f63a567c255796.docx]

Supplementary Material. Vassallo et al.

**Table A1** Number of collections per plot type per year.

N collections

Plot Type A B C D

Year

1 24 14 14 7

2 31 17 9 19

3 27 24 9 17

**Table A2** Univariable association analyses of environmental variables and nymph density classes using the data from years 1 & 2.

Variable Wald P

TM (°C) 27.06 <0.001

TM-1 0.02 0.901

TM-2 8.35 0.005

TM-3 23.89 <0.001

TM-4 151.2 <0.001

TM-5 13.12 <0.001

TM-6 2.3 0.132

Rainfall (mm) 0.78 0.48

Plot type (4) 7.68 0.058

Number of transects/collection 8.211 0.005

**Table A3.** AIC values for the backward removal of non-significant terms in the multivariable analysis

Indicated are the AIC of that model and the parameter to be removed subsequently. Full model AIC=119.24. Shown are the AICs and least significant parameters in the corresponding model.

Variable Wald P AIC

Number of transects/collection 0.03 0.865 119.24

TM3 0.77 0.381 117.26

TM2 1.06 0.304 116.03

Plot type 5.4 0.147 115.09

TM5 3.71 0.054 114.5

TM 1.83 0.176 114.2

Final model TM4 and TM6 AIC=114.08

**Table A4.** Confirmed or Probable Lyme Disease cases from Connecticut

County 2009 2010 2011 2012 2013 2014 2015 2016 2017 2018

Fairfield 698 336 308 363 450 436 429 320 418 289

Hartford 312 192 168 180 293 291 335 229 282 217

Litchfield 213 90 117 95 187 167 202 130 221 131

Middlesex 196 125 109 127 182 154 243 156 163 200

New Haven 460 242 247 330 392 461 473 354 376 333

New London 579 346 319 355 406 406 422 253 268 387

Tolland 297 170 217 176 255 230 211 156 132 138

Windham 275 153 129 162 185 159 194 149 122 149

**Table A5.** Temperature variables removed from the multivariable analysis

Variable (most non-significant 1st) Wald P-value AIC

TempM 0.6 0.46 592.11

Temp-M-4 2.1 0.147 590.74

Temp-M-2 2.7 0.10 590.84
